# Supplementary material for: Geometrical requirements for transition-metal-centered aromatic boron wheels: the case of VB10−
Source: Royal Society of Chemistry journal article supplement (doi:10.1039/c2cp42218b), 2012-01-01
Supplement: c2cp42218b.pdf [file c2cp42218b.pdf]

## Supplementary Information

### Geometrical Requirements for Transition-Metal-Centered Aromatic Boron Wheels: The Case of $\text{VB}_{10}^-$

Wei-Li Li, Constantin Romanescu, Zachary A. Piazza, Lai-Sheng Wang<sup>a)</sup>

*Department of Chemistry, Brown University, Providence, Rhode Island 02912, USA*

<sup>a)</sup> Electronic mail: Lai-Sheng\_Wang@brown.edu

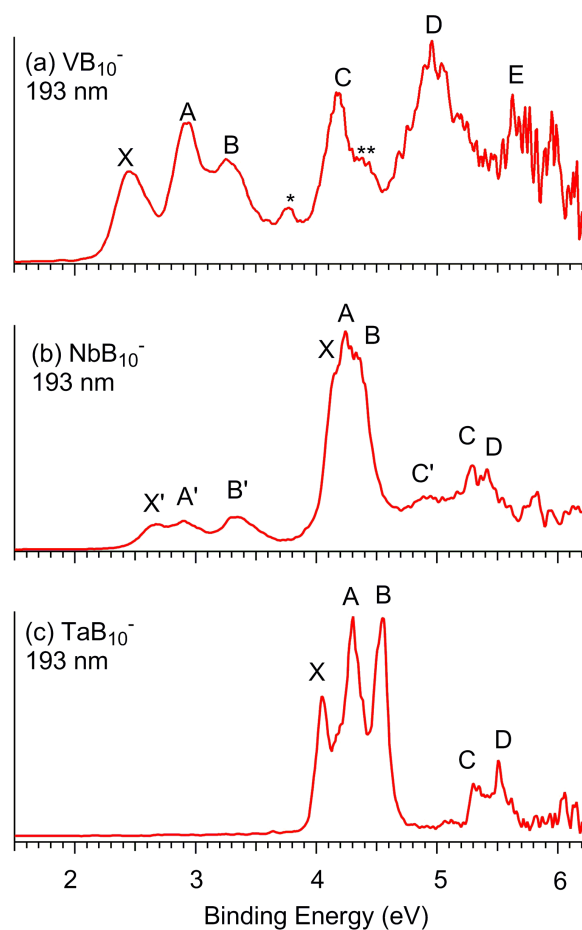

Fig. S1. Comparison of the photoelectron spectrum of  $\text{VB}_{10}^-$  with those of  $\text{NbB}_{10}^-$  and  $\text{TaB}_{10}^-$  at 193 nm.

### Cartesian Coordinates of the $\text{VB}_{10}^-$ Global Minimum and Low-Lying Isomers:

All coordinates reported at optimized BP86/6-311+G(d)/V/Stuttgart '97 geometries using the Gaussian 09 software package at the default geometric optimization settings

#### Isomer I:

|   |             |             |             |
|---|-------------|-------------|-------------|
| V | 0.00000000  | 0.00000000  | 0.92163800  |
| B | -1.15462900 | 1.07520400  | -0.60633200 |
| B | 1.15462900  | -1.07520400 | -0.60633200 |
| B | 1.92153400  | 0.20157400  | 0.01589800  |
| B | 1.44732300  | 1.69224500  | -0.02600100 |
| B | -0.62291400 | -0.57423700 | -1.10260100 |
| B | 0.62291400  | 0.57423700  | -1.10260100 |
| B | -1.92153400 | -0.20157400 | 0.01589800  |
| B | 0.00000000  | -2.12818800 | -0.40073100 |
| B | 0.00000000  | 2.12818800  | -0.40073100 |
| B | -1.44732300 | -1.69224500 | -0.02600100 |

#### Isomer II:

|   |             |             |             |
|---|-------------|-------------|-------------|
| V | 0.00000000  | 0.00000000  | 0.92332400  |
| B | -1.58642600 | 0.00000000  | -0.62455700 |
| B | 1.58642600  | 0.00000000  | -0.62455700 |
| B | 1.37902300  | 1.51685400  | -0.18658400 |
| B | 0.00000000  | 2.22296300  | -0.03622900 |
| B | 0.00000000  | -0.85073400 | -1.08969100 |
| B | 0.00000000  | 0.85073400  | -1.08969100 |
| B | -1.37902300 | -1.51685400 | -0.18658400 |
| B | 1.37902300  | -1.51685400 | -0.18658400 |
| B | -1.37902300 | 1.51685400  | -0.18658400 |
| B | 0.00000000  | -2.22296300 | -0.03622900 |

#### Isomer III:

|   |             |             |             |
|---|-------------|-------------|-------------|
| B | -2.20433900 | 0.79728100  | -0.51196000 |
| B | -1.01433000 | 1.79207800  | -0.43993600 |
| B | 0.57599500  | 1.73914700  | -0.27900200 |
| B | 2.10389800  | 1.41709800  | -0.09262800 |
| B | 2.81892200  | 0.00000000  | -0.02953600 |
| B | 2.10389900  | -1.41709800 | -0.09262800 |
| B | 0.57599600  | -1.73914600 | -0.27900200 |
| B | 1.19352300  | 0.00000000  | -0.35521700 |
| B | -1.01432900 | -1.79207900 | -0.43993500 |
| V | -0.63802100 | 0.00000000  | 0.65908800  |
| B | -2.20433900 | -0.79728200 | -0.51195900 |

#### Isomer IV:

|   |            |            |            |
|---|------------|------------|------------|
| B | 2.25437200 | 0.77263700 | 0.38696000 |
|---|------------|------------|------------|

|   |             |             |             |
|---|-------------|-------------|-------------|
| B | 1.02244700  | 1.77831000  | 0.42913600  |
| B | -0.54669300 | 1.78976400  | 0.37096000  |
| B | -2.05462200 | 1.41868800  | 0.08282300  |
| B | -2.75809900 | -0.00047100 | -0.06306000 |
| B | -2.05345800 | -1.41927800 | 0.08237000  |
| B | -0.54589000 | -1.78971800 | 0.37134700  |
| B | -1.16995900 | -0.00015600 | 0.38453700  |
| B | 1.02334700  | -1.77786600 | 0.42958700  |
| V | 0.55958900  | 0.00000200  | -0.62196400 |
| B | 2.25444500  | -0.77192100 | 0.38637500  |

**Isomer V:**

|   |             |             |             |
|---|-------------|-------------|-------------|
| B | 0.29486800  | 1.62588600  | 0.87861300  |
| B | 1.38593900  | 0.71996500  | 0.00000000  |
| B | 0.29486800  | 1.62588600  | -0.87861300 |
| B | 0.70573000  | 0.06773600  | -1.48961200 |
| B | 0.29486800  | -1.47449800 | -1.39456800 |
| B | 0.07716500  | -2.20405800 | 0.00000000  |
| B | 1.17508700  | -0.89884600 | 0.00000000  |
| B | 0.29486800  | -1.47449800 | 1.39456800  |
| B | 0.70573000  | 0.06773600  | 1.48961200  |
| V | -0.90413700 | -0.01474000 | 0.00000000  |
| B | -1.07009200 | 2.01249700  | 0.00000000  |

**Isomer VI:**

|   |             |             |             |
|---|-------------|-------------|-------------|
| V | 0.00000000  | 0.00000000  | 1.02335900  |
| B | -1.23439400 | 1.08935900  | -0.55145300 |
| B | 1.23439400  | -1.08935900 | -0.55145300 |
| B | 2.02096700  | 0.21214500  | -0.09760000 |
| B | 1.48392900  | 1.70879700  | -0.16850000 |
| B | -0.60451600 | -0.59562600 | -1.08195700 |
| B | 0.60451600  | 0.59562600  | -1.08195700 |
| B | -2.02096700 | -0.21214500 | -0.09760000 |
| B | 0.00000000  | -2.10793300 | -0.45421600 |
| B | 0.00000000  | 2.10793300  | -0.45421600 |
| B | -1.48392900 | -1.70879700 | -0.16850000 |

**Isomer VII:**

|   |             |             |             |
|---|-------------|-------------|-------------|
| B | -2.33896000 | 0.75995800  | -0.00038700 |
| B | 2.33896000  | 0.75995900  | 0.00032200  |
| B | 0.00000000  | 2.45941900  | 0.00003900  |
| B | 0.00000000  | -2.45941900 | 0.00003900  |
| B | 1.44549600  | -1.98955500 | -0.00056200 |
| B | -1.44549600 | 1.98955500  | -0.00056200 |
| B | 1.44549600  | 1.98955500  | 0.00058700  |
| B | -1.44549600 | -1.98955500 | 0.00058700  |

|   |             |             |             |
|---|-------------|-------------|-------------|
| B | 2.33896000  | -0.75995800 | -0.00038700 |
| V | 0.00000000  | 0.00000000  | 0.00000000  |
| B | -2.33896000 | -0.75995900 | 0.00032200  |

**Isomer VIII:**

|   |             |             |             |
|---|-------------|-------------|-------------|
| B | 0.05070200  | 1.89137300  | 0.79307900  |
| B | 1.10851600  | 0.82766900  | 0.00000000  |
| B | 1.23488900  | -0.66026400 | 0.82195000  |
| B | 0.18389800  | -1.80958800 | 0.00000000  |
| B | -0.19134300 | -1.18164100 | -1.55682900 |
| B | 0.31875900  | 0.49113900  | -1.63629500 |
| V | -0.89531000 | -0.02158600 | 0.00000000  |
| B | 1.23488900  | -0.66026400 | -0.82195000 |
| B | 0.05070200  | 1.89137300  | -0.79307900 |
| B | 0.31875900  | 0.49113900  | 1.63629500  |
| B | -0.19134300 | -1.18164100 | 1.55682900  |
